# Supplementary material for: GP prescribing in Northern Ireland by deprivation index: retrospective analysis
Source: PubMed Central journal article supplement — Fam Med Community Health. 2020 Jun 21;8(3):e000376. doi: 10.1136/fmch-2020-000376 (PMC7307529; doi:10.1136/fmch-2020-000376), 2020-06-21
Supplement: fmch-2020-000376supp001.pdf [file fmch-2020-000376supp001.pdf]

**Supplementary Table 1** - All BNF Sections with corresponding Kendall's tau correlation coefficient, ordered by most negative to most positive. A more negative correlation coefficient indicates a higher rate of prescribing in areas with greater socioeconomic deprivation.  $r$  = correlation coefficient,  $n$  = number of prescriptions,  $p$  = p-value,  $D_1$  = mean prescriptions per 1000 patients per 6 months in first decile (most deprived),  $D_{10}$  = mean prescriptions per 1000 patients per 6 months in tenth decile (least deprived). Section names with an asterisk (\*) represent those pre-specified as sections of interest for our analysis.

| BNF Chapter and Section | BNF Section Name                                                       | Number of drugs in section | r       | n       | p       | D <sub>1</sub> | D <sub>10</sub> |
|-------------------------|------------------------------------------------------------------------|----------------------------|---------|---------|---------|----------------|-----------------|
| 3.1                     | *Bronchodilators                                                       | 21                         | -0.4459 | 58,190  | <0.0001 | 457.4          | 207.2           |
| 4.2                     | *Drugs used in psychoses and related disorders                         | 29                         | -0.3858 | 76,420  | <0.0001 | 204.2          | 101.7           |
| 3.2                     | *Corticosteroids (respiratory)                                         | 11                         | -0.3806 | 65,868  | <0.0001 | 269.9          | 164.1           |
| 4.3                     | *Antidepressant drugs                                                  | 27                         | -0.3785 | 88,480  | <0.0001 | 1153.6         | 659.9           |
| 9.6                     | Vitamins                                                               | 42                         | -0.3434 | 65,247  | <0.0001 | 311.3          | 187.6           |
| 1.3                     | Antisecretory Drugs and Mucosal Protectants                            | 11                         | -0.3391 | 46,146  | <0.0001 | 819.5          | 537.4           |
| 4.8                     | Antiepileptic drugs                                                    | 27                         | -0.3056 | 116,490 | <0.0001 | 317.2          | 205.2           |
| 2.12                    | *Lipid-regulating drugs                                                | 19                         | -0.3054 | 47,641  | <0.0001 | 657.5          | 457.6           |
| 6.1                     | *Drugs used in diabetes                                                | 66                         | -0.3004 | 118,520 | <0.0001 | 456.8          | 307.0           |
| 1.1                     | Dyspepsia and Gastro-Oesophageal Reflux Disease                        | 23                         | -0.2997 | 15,042  | <0.0001 | 63.2           | 34.4            |
| 4.6                     | Drugs used in nausea and vertigo                                       | 14                         | -0.2842 | 26,914  | <0.0001 | 120.7          | 70.2            |
| 2.6                     | Nitrates, Calcium channel blockers, and Other antianginal drugs        | 22                         | -0.2747 | 83,012  | <0.0001 | 408.7          | 275.4           |
| 2.4                     | Beta-adrenoceptor blocking drugs                                       | 19                         | -0.2587 | 45,728  | <0.0001 | 423.0          | 315.4           |
| 10.1                    | Drugs used in rheumatic diseases and gout                              | 41                         | -0.2431 | 64,071  | <0.0001 | 305.0          | 199.7           |
| 4.1                     | *Drugs used in substance dependence                                    | 10                         | -0.2373 | 17,101  | <0.0001 | 20.3           | 28.8            |
| 2.9                     | Antiplatelet drugs                                                     | 6                          | -0.2337 | 13,674  | <0.0001 | 325.1          | 242.3           |
| 2.5                     | *Hypertension and heart failure                                        | 47                         | -0.2318 | 99,284  | <0.0001 | 541.4          | 411.8           |
| 3.4                     | Antihistamines, Hypersensitivity, and Allergic emergencies             | 20                         | -0.2278 | 38,871  | <0.0001 | 224.9          | 155.5           |
| 4.7                     | Analgesics                                                             | 48                         | -0.2181 | 153,696 | <0.0001 | 996.0          | 613.6           |
| 13.5                    | Preparations for eczema and psoriasis                                  | 16                         | -0.2123 | 17,416  | <0.0001 | 28.4           | 18.4            |
| 13.12                   | Antiperspirants                                                        | 2                          | -0.2080 | 2,141   | <0.0001 | 2.3            | 0.9             |
| 13.9                    | Shampoo and other preparations for scalp and hair conditions           | 10                         | -0.2071 | 13,137  | <0.0001 | 35.4           | 23.6            |
| 3.3                     | Cromoglycates, Related drugs, & Leukotriene Antagonists                | 5                          | -0.2062 | 7,812   | 0.0001  | 41.1           | 26.3            |
| 19.6                    | Acids                                                                  | 11                         | -0.2026 | 252     | 0.0003  | 0.4            | 0.0             |
| 9.1                     | Compound vitamin/mineral formulations                                  | 12                         | -0.1992 | 2,618   | 0.0001  | 4.6            | 1.5             |
| 19.2                    | Selective preparations                                                 | 30                         | -0.1974 | 7,855   | 0.0001  | 15.7           | 8.9             |
| 4.5                     | Obesity                                                                | 2                          | -0.1924 | 1,740   | 0.0002  | 4.9            | 1.6             |
| 1.6                     | Laxatives                                                              | 36                         | -0.1874 | 43,570  | 0.0002  | 203.7          | 155.6           |
| 3.8                     | Aromatic inhalations                                                   | 2                          | -0.1838 | 68      | 0.0023  | 0.9            | 0.0             |
| 3.7                     | Mucolytics                                                             | 4                          | -0.1813 | 4,984   | 0.0004  | 28.2           | 14.2            |
| 7.1                     | Drugs used in obstetrics                                               | 1                          | -0.1785 | 15      | 0.0036  | 0.1            | 0.0             |
| 8.2                     | Drugs affecting the immune response (malignancy and immunosuppression) | 7                          | -0.1755 | 15,208  | 0.0006  | 21.2           | 16.0            |
| 4.1                     | *Hypnotics and anxiolytics                                             | 20                         | -0.1755 | 35,272  | 0.0007  | 413.6          | 296.2           |

|       |                                                       |    |         |        |        |       |       |
|-------|-------------------------------------------------------|----|---------|--------|--------|-------|-------|
| 1.2   | Antispasmodics & Other drugs altering gut motility    | 12 | -0.1708 | 20,949 | 0.0008 | 76.4  | 55.8  |
| 3.1   | Systemic nasal decongestants                          | 6  | -0.1666 | 2,914  | 0.0011 | 6.2   | 3.2   |
| 2.2   | *Diuretics                                            | 19 | -0.1625 | 26,786 | 0.0015 | 243.8 | 202.5 |
| 9.2   | Fluids and electrolytes                               | 13 | -0.1535 | 9,722  | 0.0026 | 11.4  | 9.4   |
| 11.8  | Miscellaneous ophthalmic preparations                 | 18 | -0.1445 | 20,735 | 0.0046 | 41.2  | 32.9  |
| 10.3  | Soft-tissue disorders and topical pain relief         | 17 | -0.1441 | 19,564 | 0.0048 | 101.1 | 81.1  |
| 9.9   | Foods                                                 | 16 | -0.1379 | 3,126  | 0.0069 | 5.7   | 3.8   |
| 10.2  | Drugs used in neuromuscular disorders                 | 6  | -0.1288 | 7,716  | 0.0116 | 48.5  | 21.8  |
| 1.4   | Acute diarrhoea                                       | 3  | -0.1263 | 4,181  | 0.0134 | 24.2  | 18.6  |
| 6.5   | Hypothalamic and pituitary hormones and antioestrogen | 6  | -0.1199 | 5,608  | 0.0188 | 5.2   | 3.9   |
| 13.15 | Miscellaneous topical preparations                    | 4  | -0.1190 | 31     | 0.0505 | 0.3   | 0.0   |
| 5.4   | Antiprotozoal drugs                                   | 9  | -0.1189 | 4,483  | 0.0199 | 38.4  | 20.7  |
| 5.1   | *Antibacterial drugs                                  | 62 | -0.1177 | 88,666 | 0.0212 | 347.7 | 290.6 |
| 6.6   | Drugs affecting bone metabolism                       | 9  | -0.1157 | 8,391  | 0.0235 | 60.1  | 50.0  |
| 15.2  | Local anaesthesia                                     | 11 | -0.1137 | 8,137  | 0.0260 | 15.4  | 13.0  |
| 9.1   | Anaemias and other blood disorders                    | 20 | -0.1101 | 20,883 | 0.0310 | 173.7 | 140.1 |
| 13.13 | Wound management products                             | 1  | -0.1090 | 387    | 0.0446 | 0.6   | 0.0   |
| 1.9   | Drugs affecting intestinal secretions                 | 2  | -0.1075 | 3,462  | 0.0352 | 3.2   | 2.2   |
| 1.5   | Chronic bowel disorders                               | 9  | -0.1060 | 24,266 | 0.0379 | 26.5  | 21.4  |
| 5.5   | Anthelmintics                                         | 1  | -0.1050 | 1,238  | 0.0397 | 0.8   | 0.7   |
| 7.4   | Drugs used for genito-urinary disorders               | 26 | -0.1023 | 56,653 | 0.0452 | 166.2 | 139.8 |
| 8.1   | Cytotoxic drugs (malignancy and immunosuppression)    | 6  | -0.0997 | 3,342  | 0.0509 | 2.3   | 1.1   |
| 12.3  | Drugs acting on the oropharynx                        | 33 | -0.0955 | 13,898 | 0.0614 | 19.6  | 17.0  |
| 9.12  | Other health supplements                              | 19 | -0.0908 | 520    | 0.0909 | 0.7   | 0.0   |
| 6.2   | Thyroid and antithyroid drugs                         | 4  | -0.0907 | 14,057 | 0.0756 | 283.0 | 243.3 |
| 1.7   | Local preparations for anal & rectal disorders        | 16 | -0.0887 | 14,729 | 0.0823 | 23.3  | 20.7  |
| 15.1  | General anaesthesia                                   | 9  | -0.0825 | 2,818  | 0.1060 | 2.9   | 2.2   |
| 12.2  | Drugs acting on the nose                              | 13 | -0.0823 | 30,029 | 0.1068 | 107.3 | 93.1  |
| 13.1  | Management of skin conditions                         | 4  | -0.0767 | 21     | 0.2055 | 0.1   | 0.0   |
| 2.11  | Antifibrinolytic drugs and haemostatics               | 1  | -0.0748 | 1,891  | 0.1431 | 5.3   | 4.1   |
| 7.3   | *Contraceptives                                       | 25 | -0.0705 | 34,506 | 0.1673 | 90.3  | 81.7  |
| 13.3  | Topical local anaesthetics and antipruritics          | 6  | -0.0705 | 4,259  | 0.1673 | 5.0   | 4.0   |
| 9.8   | Metabolic disorders                                   | 4  | -0.0640 | 164    | 0.2779 | 0.9   | 0.0   |
| 4.4   | CNS stimulants and drugs used for ADHD                | 6  | -0.0629 | 22,422 | 0.2182 | 31.7  | 20.2  |
| 19.13 | Cordials/soft drinks                                  | 5  | -0.0615 | 200    | 0.2932 | 1.3   | 0.0   |
| 13.11 | Skin cleansers, antiseptics, and desloughing          | 19 | -0.0540 | 3,104  | 0.2900 | 2.4   | 2.3   |
| 9.5   | Minerals                                              | 22 | -0.0462 | 9,871  | 0.3657 | 8.7   | 7.3   |
| 3.9   | Cough preparations                                    | 10 | -0.0442 | 5,360  | 0.3868 | 6.1   | 4.8   |
| 19.4  | Single substances                                     | 14 | -0.0439 | 96     | 0.4507 | 0.3   | 0.0   |
| 6.3   | Corticosteroids (endocrine)                           | 9  | -0.0433 | 18,812 | 0.3968 | 67.7  | 61.4  |
| 1.8   | Stoma care                                            | 2  | -0.0426 | 4      | 0.4935 | 0.0   | 0.0   |
| 2.7   | Sympathomimetics                                      | 2  | -0.0412 | 759    | 0.4452 | 1.4   | 0.0   |
| 19.5  | Other preparations                                    | 3  | -0.0404 | 161    | 0.4882 | 0.7   | 0.0   |
| 13.1  | Anti-infective skin preparations                      | 31 | -0.0399 | 26,272 | 0.4341 | 46.2  | 46.5  |

|       |                                                              |     |         |        |         |       |       |
|-------|--------------------------------------------------------------|-----|---------|--------|---------|-------|-------|
| 11.7  | Local anaesthetics (eye)                                     | 3   | -0.0389 | 80     | 0.4939  | 0.2   | 0.0   |
| 5.2   | Antifungal drugs                                             | 7   | -0.0385 | 9,237  | 0.4511  | 17.7  | 17.2  |
| 5.3   | Antiviral drugs                                              | 12  | -0.0312 | 7,349  | 0.5416  | 9.9   | 10.2  |
| 11.5  | Mydriatics and cytoplegics                                   | 4   | -0.0291 | 1,794  | 0.5686  | 1.2   | 0.5   |
| 19.14 | Waters                                                       | 1   | -0.0234 | 516    | 0.6646  | 0.9   | 0.0   |
| 9.4   | Oral nutrition                                               | 313 | -0.0196 | 82,138 | 0.7010  | 86.9  | 80.4  |
| 2.1   | Positive inotropic drugs                                     | 2   | -0.0191 | 5,415  | 0.7087  | 18.6  | 17.5  |
| 8.3   | Sex hormones and antagonists in malignancy                   | 19  | -0.0116 | 18,044 | 0.8198  | 22.6  | 21.9  |
| 13.4  | Topical corticosteroids                                      | 29  | -0.0071 | 63,498 | 0.8892  | 132.8 | 128.8 |
| 13.6  | Acne and rosacea                                             | 15  | -0.0053 | 18,560 | 0.9181  | 22.3  | 21.6  |
| 11.4  | Corticosteroids and other anti-inflammatory eye preparations | 22  | -0.0002 | 15,105 | 0.9969  | 18.8  | 17.8  |
| 13.2  | Emollient and barrier preparations                           | 56  | 0.0034  | 56,075 | 0.9471  | 168.7 | 158.9 |
| 13.14 | Topical circulatory preparations                             | 1   | 0.0077  | 1,339  | 0.8818  | 1.0   | 0.0   |
| 2.8   | Anticoagulants and protamine                                 | 14  | 0.0090  | 27,806 | 0.8605  | 128.6 | 122.4 |
| 19.9  | Disinfectants, preservatives, and stabilising agents         | 1   | 0.0145  | 2      | 0.8158  | 0.0   | 0.0   |
| 6.7   | Other endocrine drugs                                        | 8   | 0.0147  | 1,335  | 0.7735  | 1.0   | 0.1   |
| 19.1  | Alcohol, wines, and spirits                                  | 1   | 0.0180  | 5      | 0.7723  | 0.0   | 0.0   |
| 2.3   | Anti-arrhythmic drugs                                        | 6   | 0.0193  | 6,445  | 0.7049  | 6.0   | 4.7   |
| 9.11  | Health supplements                                           | 20  | 0.0343  | 1,057  | 0.5091  | 0.8   | 0.0   |
| 11.3  | Anti-infective eye preparations                              | 12  | 0.0398  | 7,736  | 0.4356  | 15.2  | 16.9  |
| 13.7  | Preparations for warts and calluses                          | 8   | 0.0471  | 5,076  | 0.3561  | 3.6   | 4.3   |
| 13.8  | Sunscreens and camouflagers                                  | 17  | 0.0500  | 7,598  | 0.3271  | 7.4   | 8.0   |
| 12.1  | Drugs acting on the ear                                      | 14  | 0.0604  | 8,105  | 0.2368  | 17.9  | 18.6  |
| 4.9   | Drugs used in Parkinsonism and related disorders             | 22  | 0.0611  | 34,479 | 0.2317  | 43.3  | 43.4  |
| 19.7  | Base/Dil/Susp agents/Stabilisers                             | 14  | 0.0831  | 5,577  | 0.1035  | 8.6   | 9.2   |
| 4.11  | Dementia                                                     | 4   | 0.0976  | 17,085 | 0.0559  | 46.3  | 58.1  |
| 11.6  | Treatment of glaucoma                                        | 21  | 0.1109  | 32,715 | 0.0298  | 42.7  | 51.8  |
| 6.4   | Sex hormones                                                 | 37  | 0.1217  | 50,974 | 0.0172  | 71.5  | 83.0  |
| 7.2   | Treatment of vaginal and vulval conditions                   | 11  | 0.1406  | 15,470 | 0.0059  | 26.4  | 37.5  |
| 14.4  | Vaccines and antisera                                        | 20  | 0.2176  | 8,557  | <0.0001 | 8.5   | 13.1  |
